# Supplementary material
Source: PubMed Central journal article supplement (PMC8326038)
Supplement: nqab081_supplemental_file.pdf [file nqab081_supplemental_file.pdf]

# **Polymorphisms in SLC44A1 are Associated with Cognitive Improvement in Children Diagnosed with Fetal Alcohol Spectrum Disorder: An Exploratory Study of Oral Choline Supplementation.**

Smith et al.

## **On-line Supplementary Materials**

### **List of Supplementary Figures and Tables**

**Supplementary Figure 1. Principal Component Analysis of SLC44A1 Genotype and Population Characteristics.** Principal Component Analysis (PCA; FactoMineR, v2.3) was used to examine the genomic separation of the 52 participants based on race, sex, treatment, diagnostic category, or age. No significant associations between the 26 SNPs in SLC44A1 from Table 3 and any of these population characteristics were observed in any of the analyses. (A) Self-identified race vs genotype. Red circle, Native American (N=10); Blue triangle, Asian (N=2); Green square, black or African-American (N=13); Purple cross, multiracial (N=7); Yellow crossed square, white or Caucasian (N=19); Orange crossed square, unknown (N=1). (B) Sex vs genotype. Red circle, female (N=33); blue triangle, male (N=19). (C) Treatment vs. genotype. Red circle, choline-treated (N=26); blue triangle, placebo-treated (N=26). (D) Diagnostic category vs genotype. Red circle, alcohol-related neurodevelopmental disorder (ARND, N=23); blue triangle, fetal alcohol syndrome (FAS; N=9); green square, partial FAS (N=20). (E) Age vs genotype. Red circle, 3yrs or younger (N=12); blue triangle, older than 3yrs (N=40). The largest symbol for each population characteristic represents the group mean for that characteristic, and the ellipse represents the 95% confidence interval surrounding that group mean.

**Supplementary Table 1. List of 243 Choline-Related Human Single-Nucleotide Polymorphisms (SNPs) that Were Evaluated.**

**Supplementary Table 2. Significance Values for Three Genetic Models Testing the Association between Cognitive Performance and Single Nucleotide Polymorphism (SNP) within the SLC44A1 Gene.**

**Supplementary Table 3. Single Nucleotide Polymorphism (SNP) Associations within All Participants and within Placebo-Treated Participants.**

# Supplementary Figure 1

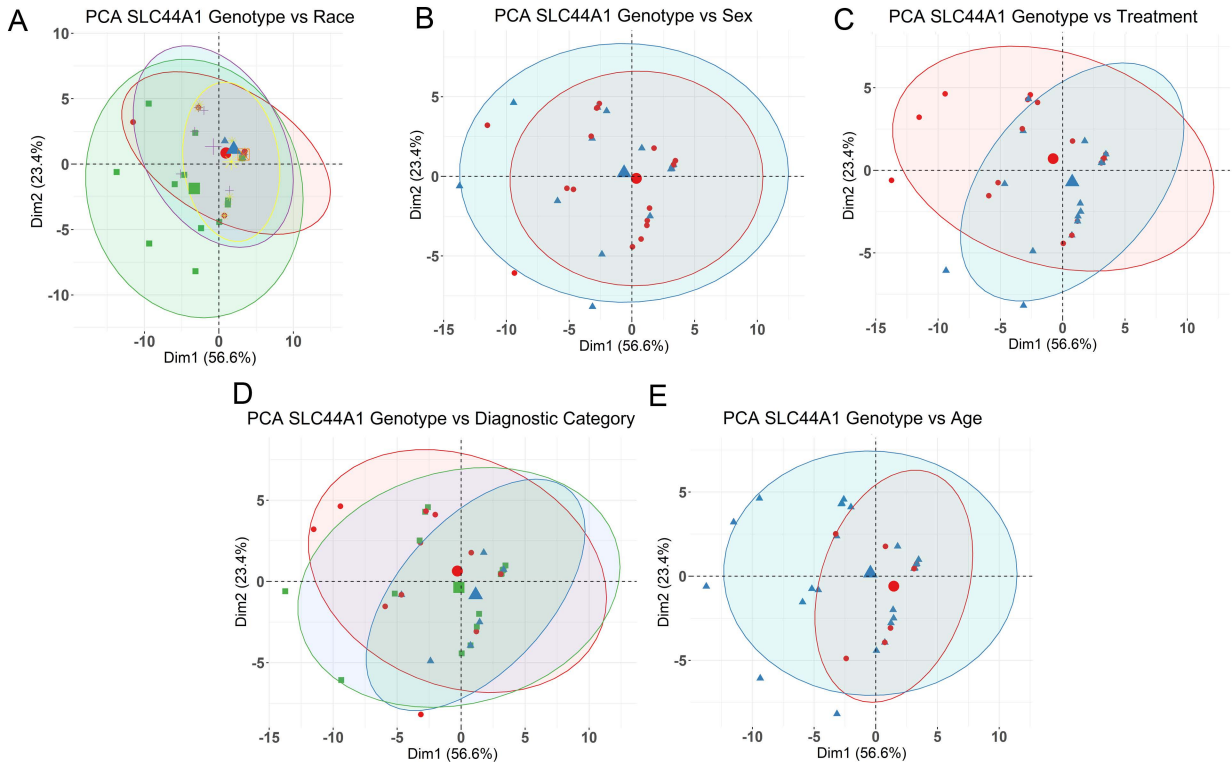

**Supplementary Table 1**  
**List of 243 Choline-Related Human Single-Nucleotide Polymorphisms (SNPs) that Were Evaluated**

|            |            |            |            |           |
|------------|------------|------------|------------|-----------|
| rs10120572 | rs17037390 | rs3071     | rs492842   | rs7849463 |
| rs10123494 | rs17037396 | rs31653    | rs498793   | rs7865985 |
| rs10131416 | rs17156442 | rs31658    | rs522951   | rs786935  |
| rs1017054  | rs1736557  | rs31662    | rs526126   | rs7873937 |
| rs1025689  | rs1736560  | rs31666    | rs538316   | rs7904497 |
| rs1045075  | rs17367504 | rs31671    | rs542852   | rs7946    |
| rs1054411  | rs17421511 | rs31672    | rs558133   | rs8003379 |
| rs1076991  | rs174568   | rs3199966  | rs55931354 | rs8003567 |
| rs10820801 | rs174570   | rs327947   | rs567754   | rs8011839 |
| rs10991611 | rs174575   | rs327956   | rs569910   | rs8016556 |
| rs10991618 | rs174589   | rs327959   | rs574122   | rs8072971 |
| rs10991639 | rs174602   | rs328006   | rs5770917  | rs8187799 |
| rs1108579  | rs174605   | rs34750132 | rs585800   | rs822393  |
| rs1109859  | rs174618   | rs35603631 | rs5899654  | rs838133  |
| rs11481    | rs17597141 | rs3747806  | rs6010024  | rs868014  |
| rs11557927 | rs1801131  | rs3753584  | rs608622   | rs877483  |
| rs11627387 | rs1801133  | rs3754491  | rs610745   | rs877484  |
| rs11656215 | rs1801282  | rs3761612  | rs61588443 | rs881883  |
| rs11849530 | rs1805087  | rs3763945  | rs631305   | rs893363  |
| rs1202283  | rs1920149  | rs3774616  | rs6445606  | rs909530  |
| rs1207651  | rs193008   | rs3783726  | rs6445607  | rs909531  |
| rs12121543 | rs1950902  | rs3783731  | rs6479311  | rs930367  |
| rs12247426 | rs1956545  | rs3797546  | rs6479313  | rs936108  |
| rs12335779 | rs1979277  | rs3818239  | rs6591331  | rs939883  |
| rs12339823 | rs2064074  | rs3819255  | rs6659176  | rs9644967 |
| rs12344346 | rs2066471  | rs3978768  | rs6667720  | rs9651118 |
| rs12404218 | rs2066534  | rs41272270 | rs6766480  | rs968567  |
| rs1242490  | rs2071645  | rs4148809  | rs6793451  | rs9840079 |
| rs12539936 | rs2072114  | rs4148811  | rs6798958  | rs9846156 |
| rs1256143  | rs2088666  | rs4148812  | rs6875201  | rs988448  |
| rs1256146  | rs2167444  | rs4148822  | rs6893970  | rs9891119 |
| rs12567062 | rs2184226  | rs4148824  | rs6946119  | rs9910747 |
| rs12630070 | rs2234970  | rs4148828  | rs7024985  | rs99780   |
| rs12632013 | rs2236224  | rs4244599  | rs7029443  | rs998671  |
| rs12632779 | rs2236225  | rs440290   | rs7088953  | rs999515  |
| rs12637288 | rs2238834  | rs443094   | rs711352   |           |
| rs12676    | rs2241766  | rs4479310  | rs7151163  |           |
| rs1275103  | rs2241807  | rs4545327  | rs7214988  |           |
| rs12846498 | rs2241808  | rs4549843  | rs7215833  |           |
| rs13342397 | rs2266780  | rs4563403  | rs7224725  |           |
| rs1393491  | rs2266782  | rs4646340  | rs7238     |           |
| rs140514   | rs2281135  | rs4646341  | rs735877   |           |
| rs1476413  | rs2289205  | rs4646342  | rs738409   |           |
| rs1526090  | rs2289207  | rs4646383  | rs745686   |           |
| rs1531100  | rs2289209  | rs4646394  | rs748196   |           |
| rs1535     | rs234706   | rs4687591  | rs7539542  |           |
| rs1557503  | rs2417614  | rs4687747  | rs7626693  |           |
| rs1580820  | rs2417615  | rs482548   | rs7627178  |           |
| rs16876512 | rs2511439  | rs4846048  | rs7634578  |           |
| rs16876528 | rs2516557  | rs4846049  | rs7700970  |           |
| rs16924529 | rs2771040  | rs4846052  | rs7789645  |           |
| rs16961834 | rs2983733  | rs4899135  | rs7849     |           |

**Supplementary Table 2**  
**Significance Values for Three Genetic Models Testing the Association between Cognitive Performance**  
**and SNPs within the SLC44A1 Gene**

| <b>SNP</b> | <b><i>P</i>-values for delta_pairs_imm<sup>1</sup></b> |                 |                  | <b><i>P</i>-values for delta_adjpairs_imm<sup>1</sup></b> |                 |                  |
|------------|--------------------------------------------------------|-----------------|------------------|-----------------------------------------------------------|-----------------|------------------|
|            | <b>Additive</b>                                        | <b>Dominant</b> | <b>Recessive</b> | <b>Additive</b>                                           | <b>Dominant</b> | <b>Recessive</b> |
| rs10123494 | 0.005672                                               | 0.2693          | 0.1455           | 0.0005061                                                 | 0.04397         | 0.06602          |
| rs10820801 | 0.005141                                               | 0.08847         | 0.2693           | 0.0014686                                                 | 0.1014          | 0.04397          |
| rs10991639 | 0.005141                                               | 0.2693          | 0.08847          | 0.0014686                                                 | 0.04397         | 0.1014           |
| rs2417615  | 0.005141                                               | 0.2693          | 0.08847          | 0.0014686                                                 | 0.04397         | 0.1014           |
| rs2771040  | 0.005141                                               | 0.08847         | 0.2693           | 0.0014686                                                 | 0.1014          | 0.04397          |
| rs3199966  | 0.049691                                               | 1.0000          | 0.08847          | 0.001284                                                  | 0.1191          | 0.1014           |
| rs34750132 | 0.005672                                               | 0.1455          | 0.2693           | 0.0005061                                                 | 0.06602         | 0.04397          |
| rs35603631 | 0.005672                                               | 0.2693          | 0.1455           | 0.0005061                                                 | 0.04397         | 0.06602          |
| rs4549843  | 0.005141                                               | 0.2693          | 0.08847          | 0.001468                                                  | 0.04397         | 0.1014           |
| rs6479311  | 0.005141                                               | 0.2693          | 0.08847          | 0.001468                                                  | 0.04397         | 0.1014           |
| rs6479313  | 0.005672                                               | 0.1455          | 0.2693           | 0.0005061                                                 | 0.06602         | 0.04397          |
| rs7024985  | 0.005141                                               | 0.08847         | 0.2693           | 0.001468                                                  | 0.1014          | 0.04397          |
| rs7029443  | 0.005672                                               | 0.2693          | 0.1455           | 0.0005061                                                 | 0.04397         | 0.06602          |
| rs7865985  | 0.005672                                               | 0.2693          | 0.1455           | 0.0005061                                                 | 0.04397         | 0.06602          |
| rs12339823 | 1.00000                                                | 1.0000          | 1.0000           | 0.004567                                                  | 0.1451          | 0.1191           |
| rs16924529 | 0.8095                                                 | 1.0000          | 1.0000           | 0.02303                                                   | 0.6422          | 0.2861           |

<sup>1</sup> Associations between SNPs and outcomes were tested under an Additive, Dominant, or Recessive genetic model using the SNPAssoc package in R (v.1.9-2). *P*-values are adjusted for multiple correction testing using the Bonferroni correction. Delta\_pairs\_imm is the change in Elicited Imitation immediate memory task performance (pairs) between baseline (0 months) and 9 months; delta\_adjpairs\_imm is the change in Elicited Imitation immediate memory task performance (adjacent pairs of items) between baseline (0 months) and 9 months. SNP, single nucleotide polymorphism.

**Supplementary Table 3**  
**Single Nucleotide Polymorphism (SNP) Associations within All Participants**  
**and within Placebo-Treated Participants**

| Gene                                | SNP        | P-Value <sup>1</sup> | Reg. Coeff. <sup>2</sup> | Outcome                 | Effect Allele (Major > Minor allele within this cohort <sup>3</sup> ) | # w/Effect Allele <sup>4</sup> |
|-------------------------------------|------------|----------------------|--------------------------|-------------------------|-----------------------------------------------------------------------|--------------------------------|
| <b>All Participants</b>             |            |                      |                          |                         |                                                                       |                                |
| <i>BHMT</i>                         | rs558133   | 0.00803              | -1.1874                  | iib_tscore13            | Increased with G (T > G)                                              | 12/31                          |
|                                     | rs558133   | 0.00446              | -1.2150                  | iib_tscore20            | Increased with G (T > G)                                              | 12/31                          |
|                                     | rs567754   | 0.04457              | 0.6522                   | weight_z_physical.1     | Increased with C (C > T)                                              | 27/52                          |
|                                     | rs567754   | 0.01134              | 0.7021                   | weight_pile_physical.1  | Increased with C (C > T)                                              | 27/52                          |
| <i>C1orf167</i> <sup>5</sup>        | rs4846048  | 0.01013              | 0.7578                   | t_score3.1              | Increased with T (T > C)                                              | 32/52                          |
|                                     | rs6667720  | 0.01013              | 0.7578                   | t_score3.1              | Increased with A (A > G)                                              | 32/52                          |
| <i>FADS2</i>                        | rs2072114  | 0.03062              | 1.0230                   | height_physical.11      | Increased with A (A > G)                                              | 15/43                          |
|                                     | rs17156442 | 0.03616              | -1.2654                  | imt_adjpairs_imm_med.11 | Increased with T (C > T)                                              | 10/45                          |
| <i>FMO3</i>                         | rs2064074  | 0.04245              | 0.7471                   | weight_pile_physical.3  | Increased with A (A > G)                                              | 33/45                          |
|                                     | rs2266782  | 0.04386              | 0.9812                   | stanfbi_wm              | Increased with G (G > A)                                              | 19/30                          |
| <i>MTHFR</i>                        | rs4846048  | 0.01013              | 0.7578                   | t_score3.1              | Increased with A (A > G)                                              | 32/52                          |
|                                     | rs4846049  | 0.04725              | 0.6371                   | t_score8.11             | Increased with G (G > T)                                              | 31/47                          |
| <i>SHMT1</i>                        | rs1979277  | 0.00565              | 0.8561                   | t_score8.11             | Increased with G (G > A)                                              | 26/47                          |
|                                     | rs1979277  | 0.03168              | 0.7864                   | t_score13.11            | Increased with G (G > A)                                              | 26/47                          |
| <i>SLC44A1</i>                      | rs10991611 | 0.05041              | -0.8590                  | weight_pile_physical.1  | Increased with T (C > T)                                              | 19/52                          |
|                                     | rs193008   | 0.04009              | -0.8186                  | weight_pile_physical.1  | Increased with C (T > C)                                              | 19/52                          |
|                                     | rs328006   | 0.04009              | -0.8186                  | weight_pile_physical.1  | Increased with C (G > C)                                              | 19/52                          |
| <b>Placebo-Treated Participants</b> |            |                      |                          |                         |                                                                       |                                |
| <i>ADIPOQ</i>                       | rs1501299  | 0.03572              | 1.4149                   | heart_rate.11           | Increased with C (C > A)                                              | 14/23                          |
| <i>CHDH</i>                         | rs6445607  | 0.03454              | 1.0166                   | ilb_avg_imt_pairs       | Increased with T (T > G)                                              | 8/16                           |
| <i>FADS2</i>                        | rs174570   | 0.0.0107             | 1.1459                   | height_z_physical.11    | Increased with C (C > T)                                              | 10/20                          |
|                                     | rs1535     | 0.02252              | 0.9336                   | height_pile_physical.11 | Increased with A (A > G)                                              | 12/20                          |
|                                     | rs174568   | 0.02495              | 0.9842                   | height_pile_physical.11 | Increased with C (C > T)                                              | 12/20                          |
|                                     | rs174570   | 0.00311              | 1.1913                   | height_pile_physical.11 | Increased with C (C > T)                                              | 10/20                          |
| <i>FMO3</i>                         | rs1736557  | 0.02311              | -2.0903                  | t_score_2.11            | Increased with A (G > A)                                              | 3/23                           |
| <i>MDR3</i>                         | rs17149601 | 0.04610              | -1.3515                  | height_z_physical.1     | Increased with T (C > T)                                              | 4/26                           |
|                                     | rs3747806  | 0.00040              | -2.1382                  | weight_z_physical.11    | Increased with C (T > C)                                              | 4/26                           |
|                                     | rs988448   | 0.00040              | -2.1382                  | weight_z_physical.11    | Increased with C (T > C)                                              | 4/26                           |
|                                     | rs3747806  | 0.00064              | -2.0963                  | weight_z_physical.3     | Increased with C (T > C)                                              | 4/24                           |
|                                     | rs988448   | 0.00064              | -2.0963                  | weight_z_physical.3     | Increased with C (T > C)                                              | 4/24                           |

|                |            |         |         |                            |                          |       |
|----------------|------------|---------|---------|----------------------------|--------------------------|-------|
|                | rs3747806  | 0.01805 | -2.1050 | weight_z_physical.8        | Increased with C (T > C) | 3/22  |
|                | rs988448   | 0.01805 | -2.1050 | weight_z_physical.8        | Increased with C (T > C) | 3/22  |
|                | rs3747806  | 0.03521 | -1.8293 | weight_pile_physical.1     | Increased with C (T > C) | 4/26  |
|                | rs988448   | 0.03521 | -1.8293 | weight_pile_physical.1     | Increased with C (T > C) | 4/26  |
|                | rs17149601 | 0.03633 | 1.4797  | delta_imt_v1_v13_adjpairs  | Increased with C (C > T) | 2/16  |
| <i>MTHFD1</i>  | rs2236224  | 0.02142 | 1.1274  | iib_tscore13               | Increased with C (T > C) | 7/16  |
|                | rs2236225  | 0.02142 | 1.1274  | iib_tscore13               | Increased with C (T > C) | 7/16  |
| <i>MTHFR</i>   | rs17421511 | 0.04028 | 1.3885  | stanfbi_viq                | Increased with G (G > A) | 3/16  |
|                | rs17421511 | 0.03304 | 1.3989  | stanfbi_fsiq               | Increased with G (G > A) | 3/16  |
|                | rs17421511 | 0.02254 | 1.4180  | stanfbi_wm                 | Increased with G (G > A) | 3/16  |
| <i>MTR</i>     | rs1805087  | 0.01743 | 1.1302  | memfaces_delcontrastsc     | Increased with A (A > G) | 5/13  |
| <i>PCYT1A</i>  | rs2088666  | 0.03441 | -1.0092 | blood_pressure_diastolic.1 | Increased with A (G > A) | 15/25 |
| <i>SCD</i>     | rs2167444  | 0.00679 | 2.6052  | imt_comp_sd_avemh.11       | Increased with T (T > A) | 2/22  |
| <i>SLC44A1</i> | rs10991618 | 0.00736 | -1.7901 | weightheight_z_physical.1  | Increased with A (G > A) | 5/26  |

<sup>1</sup> Associations between SNPs and outcomes were tested under an Additive genetic model using the SNPAssoc package in R (v.1.9-2). *P*-values are adjusted for multiple correction testing using the Bonferroni correction.

<sup>2</sup> Regression Coefficient

<sup>3</sup> Measured on top strand, 5' → 3'. Effect allele; (Major > Minor allele in this cohort). All are Single Nucleotide Variants (SNVs).

<sup>4</sup> Number of individuals carrying at least one copy of the effect allele; some outcomes were missing for some children, and these were excluded from that analysis.

<sup>5</sup> Likely maps within MTHFR.
